# Supplementary material for: Ternary Mixture of Azoxystrobin, Boscalid and Pyraclostrobin Disrupts the Gut Microbiota and Metabolic Balance of Honeybees (Apis cerana cerana)
Source: MDPI journal article supplement (doi:10.3390/ijms24065354), 2023-03-10
Supplement: s1 [file s1]

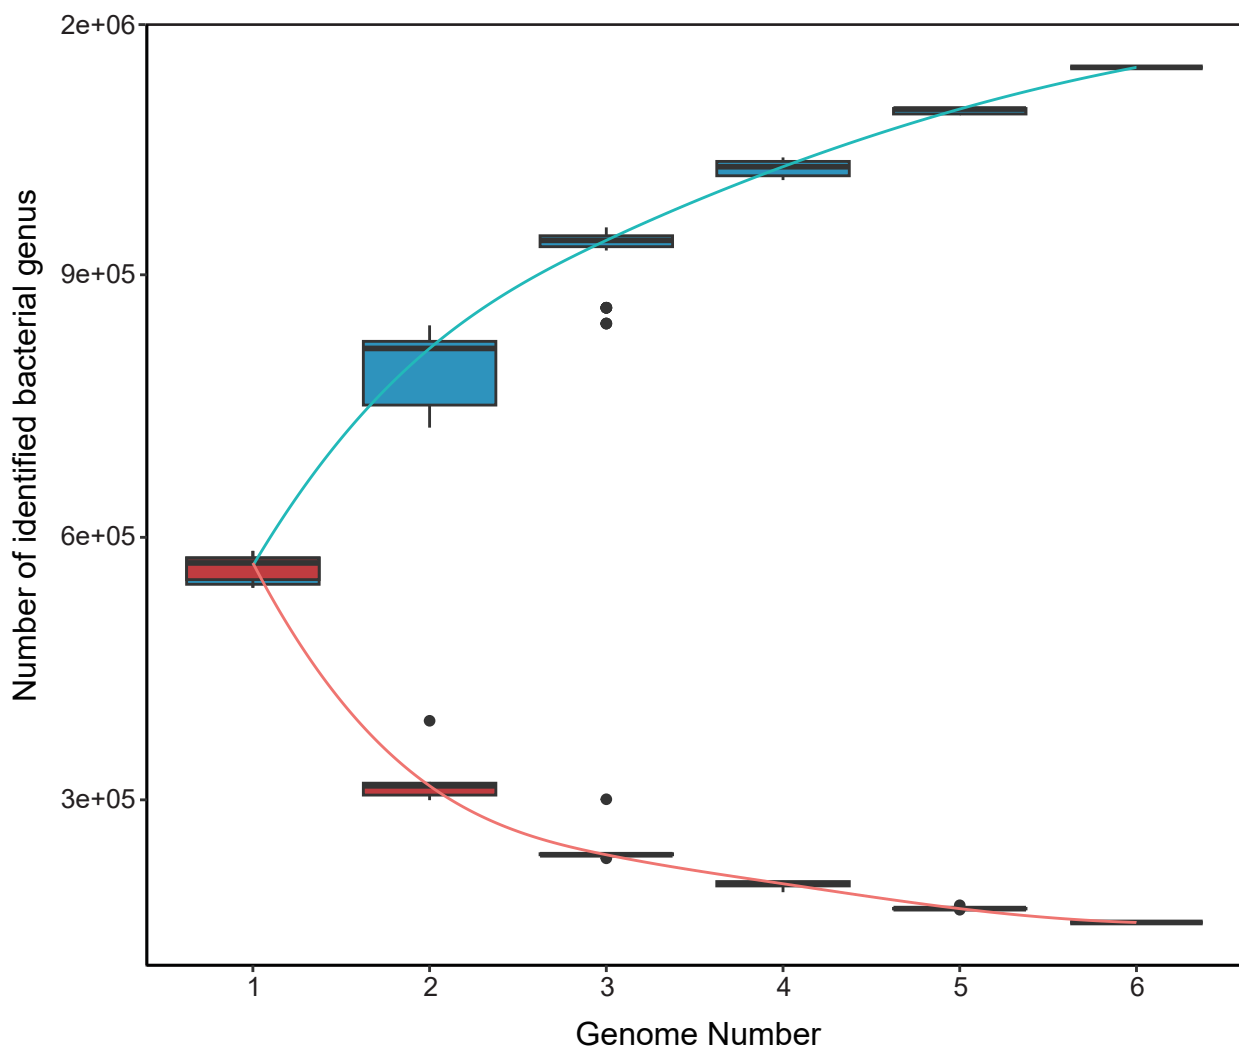

**Figure S1:** The rarefaction analysis of identified bacteria at genus level. Blue line represents the pan-genome, red line represents the core genome. Genome number represents 6 metagenome samples.
